# Supplementary material
Source: PubMed Central journal article supplement (PMC7075540)
Supplement: bi9b00530_si_001.pdf [file bi9b00530_si_001.pdf]

## **SUPPLEMENTARY INFORMATION**

### **Enzyme-Catalyzed Kinetic Resolution of Chiral Precursors to Antiviral Prodrugs**

**Dao Feng Xiang, Andrew N. Bigley, Emily Desormeaux,  
Tamari Narindoshvili, and Frank M. Raushel\***

**Department of Chemistry, Texas A&M University,  
College Station, Texas 77843, United States**

Table S1. Initial screening results with PTE variants.

| Variant <sup>a</sup> | Selective hydrolysis | Variant   | Selective hydrolysis  |
|----------------------|----------------------|-----------|-----------------------|
| BHR-1                | none                 | BHR-43    | none                  |
| BHR-2                | none                 | BHR-44    | none                  |
| BHR-3                | none                 | BHR-46    | poor                  |
| BHR-4                | none                 | BHR-47    | none                  |
| BHR-5                | none                 | BHR-48    | none                  |
| BHR-7                | none                 | BHR-49    | none                  |
| BHR-9                | none                 | BHR-50    | none                  |
| BHR-11               | none                 | BHR-53    | poor                  |
| BHR-13               | none                 | BHR-57    | none                  |
| BHR-14               | none                 | BHR-61    | none                  |
| BHR-15               | none                 | BHR-62    | none                  |
| BHR-16               | poor                 | BHR-63    | none                  |
| BHR-18               | poor                 | BHR-64    | yes (S <sub>p</sub> ) |
| BHR-19               | none                 | BHR-65    | none                  |
| BHR-20               | none                 | BHR-66    | poor                  |
| BHR-21               | none                 | BHR-68    | none                  |
| BHR-23               | none                 | BHR-69    | none                  |
| BHR-24               | none                 | BHR-70    | yes (S <sub>p</sub> ) |
| BHR-25               | none                 | BHR-71    | poor                  |
| BHR-27               | none                 | BHR-73    | none                  |
| BHR-28               | poor                 | BHR-74    | none                  |
| BHR-29               | none                 | BHR-75    | none                  |
| BHR-31               | none                 | BHR-76    | yes (S <sub>p</sub> ) |
| BHR-33               | poor                 | G60A-PTE  | Yes (R <sub>p</sub> ) |
| BHR-34               | poor                 | GGY-PTE   | none                  |
| BHR-36               | none                 | YT-PTE    | none                  |
| BHR-38               | none                 | Wild-type | poor                  |
| BHR-40               | none                 | In1W-PTE  | yes (S <sub>p</sub> ) |
| BHR-41               | none                 |           |                       |

<sup>a</sup>Variants are from references<sup>1-5</sup>. Screening was done as total hydrolysis of 60 μM of compound **1** in 1 mL with 50 mM Ches (pH 9.0) and 100 μM CoCl<sub>2</sub> at 30 °C.

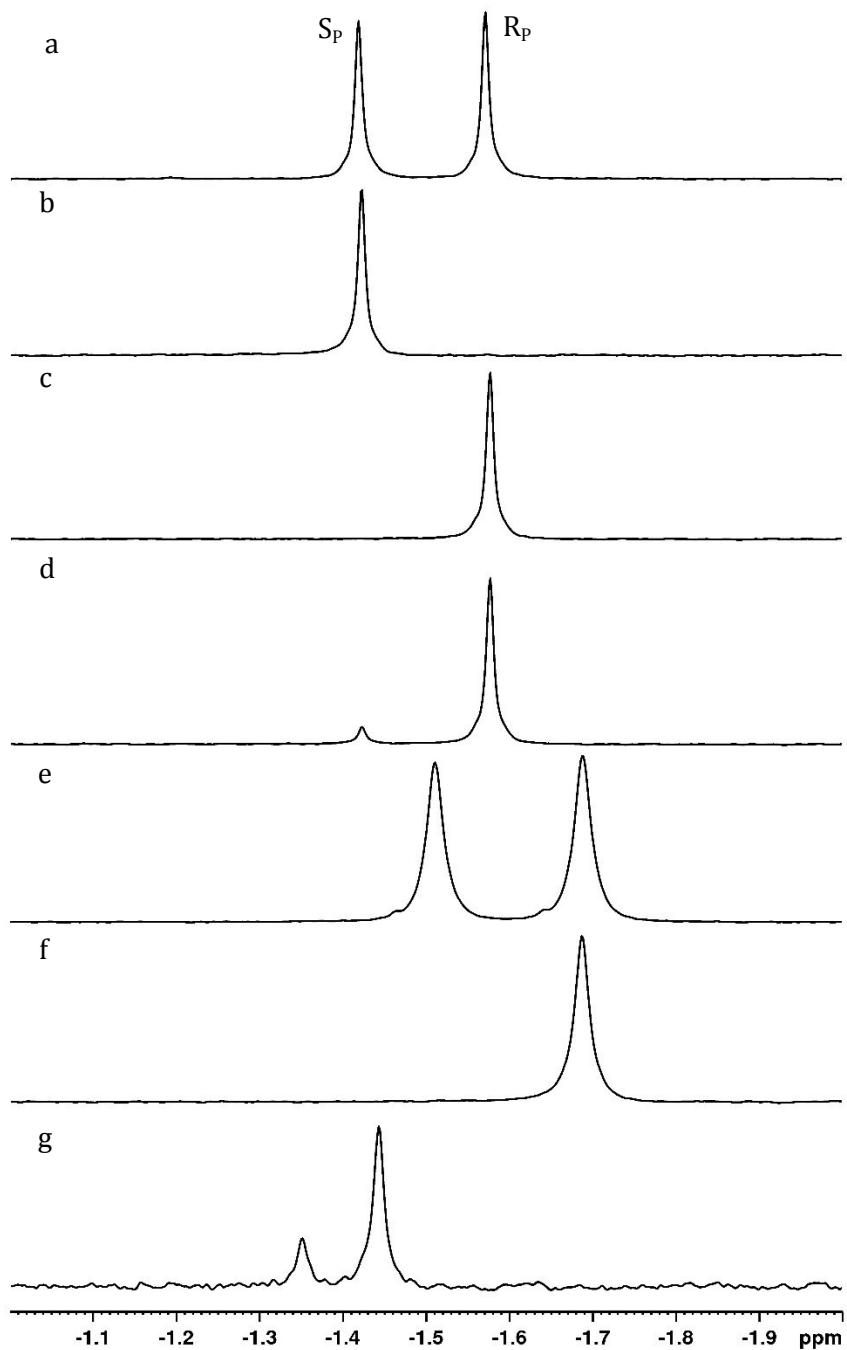

**Figure S1.** Chemical shifts of isomers of compound **1** in different solvents. (a) Racemate in DMSO. Resonance at -1.42 ppm is from the  $S_p$ -isomer, and the resonance at -1.58 is from the  $R_p$ -isomer. (b)  $S_p$ -isomer isolated by selective hydrolysis with G60A-PTE in DMSO. (c)  $R_p$ -isomer isolated by selective hydrolysis using In1W-PTE in DMSO. (d) Sample from **c** spiked with sample from **b**. (e) Racemate in methanol. Resonance at -1.51 ppm is due to  $S_p$ -isomer, and resonance at -1.69 ppm is due to the  $R_p$ -isomer. (f)  $R_p$ -isomer isolated by selective hydrolysis with In1W-PTE in methanol. (g) Hydrolysis of compound **1** by In1W-PTE at 40% completion in water.

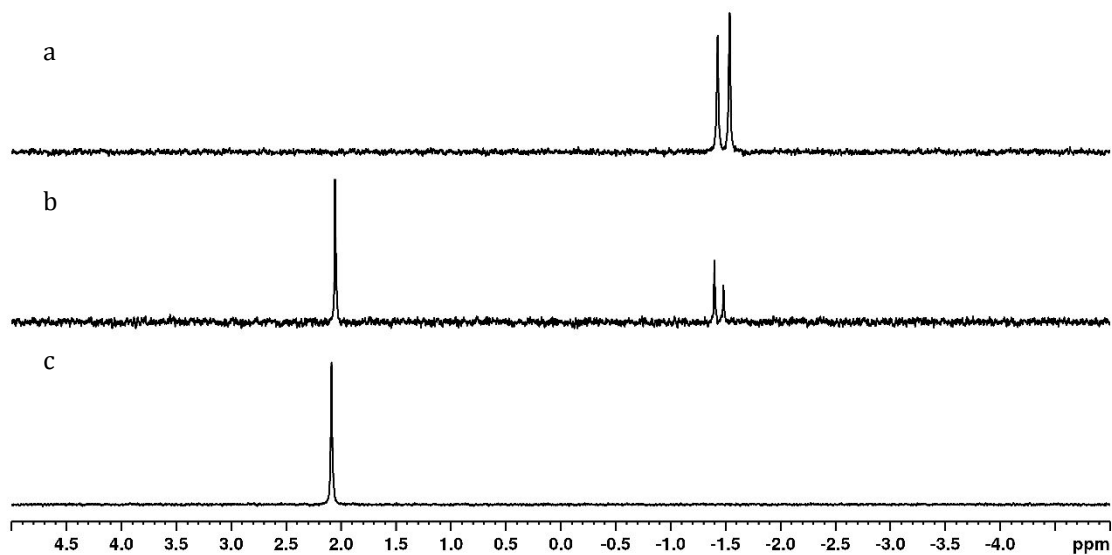

**Figure S2.**  $^{31}\text{P}$  NMR spectra of compound **1** and hydrolysis product in water. (a) Two diastereomers of compound **1**.  $S_{\text{P-1}}$  is at -1.43 ppm while  $R_{\text{P-1}}$  is at -1.54 ppm. (b) Hydrolysis of compound **1** by wild-type PTE at 60% completion. The single phosphorus containing hydrolysis product is seen at 2.05 ppm. (c) Complete hydrolysis of compound **1** by wild-type PTE.

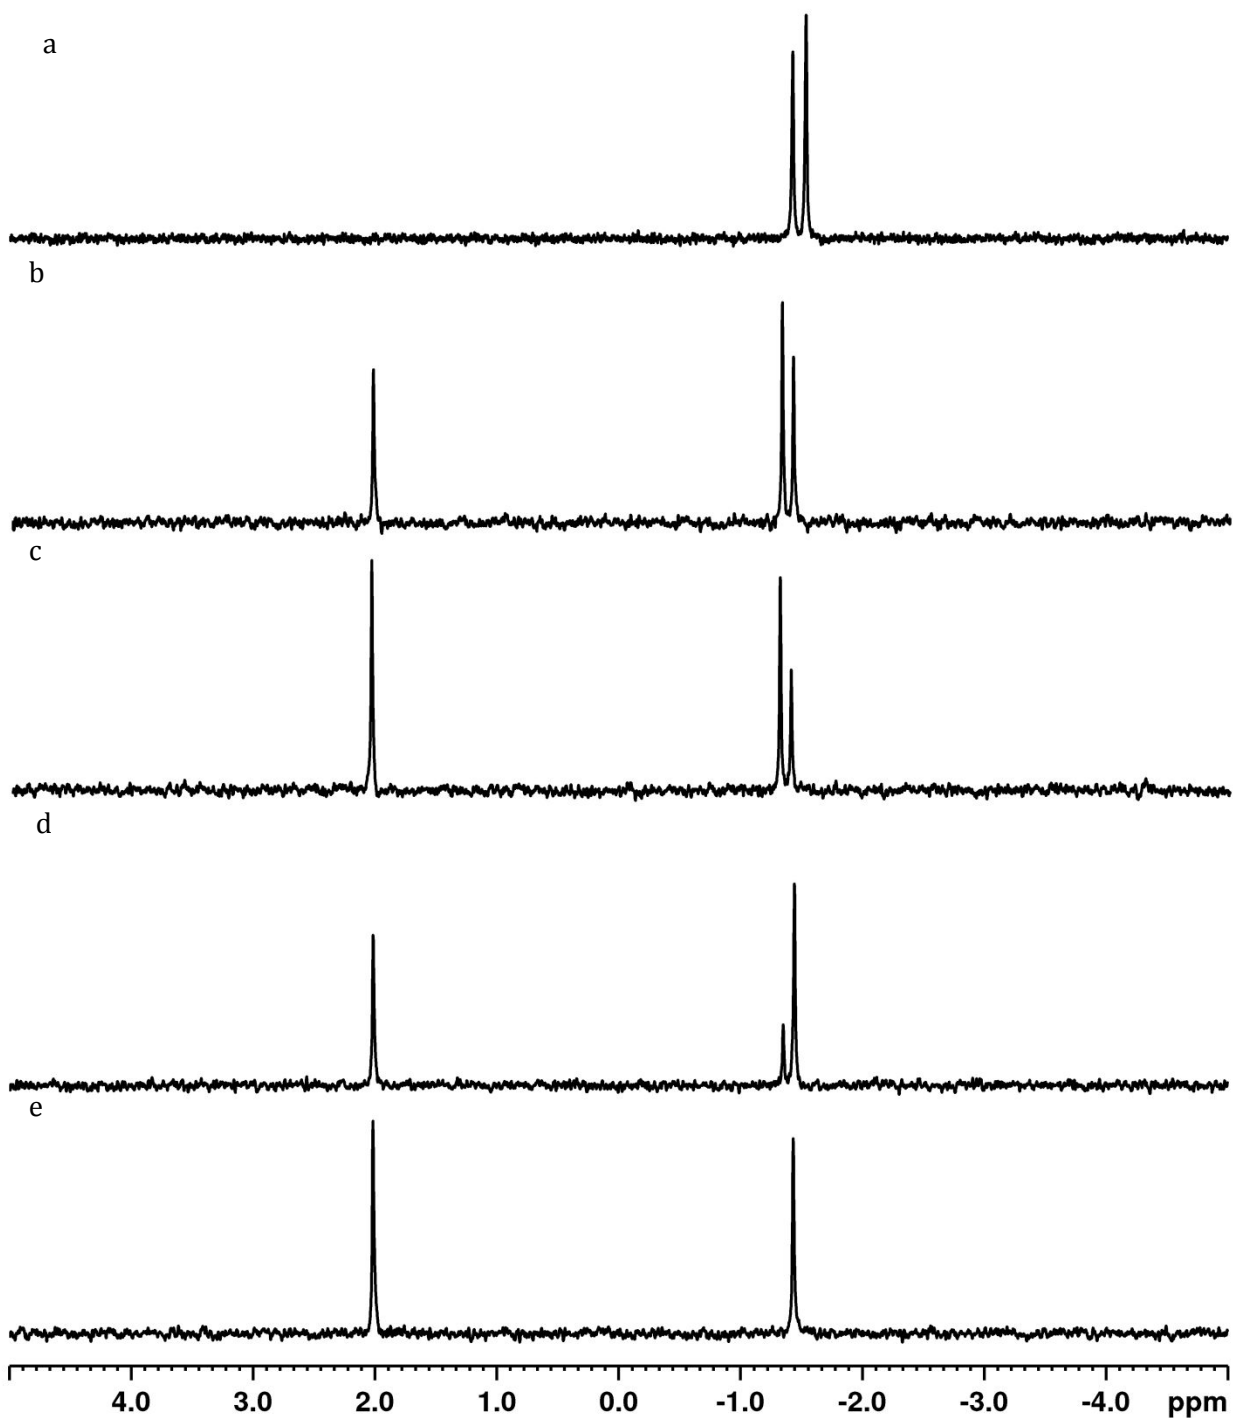

**Figure S3.**  $^{31}\text{P}$  NMR spectra of the differential hydrolysis of compound **1** by variants of PTE. (a)  $^{31}\text{P}$  NMR spectrum of 2.0 mM compound **1**.  $S_{\text{P}}\text{-1}$  is at -1.43 ppm while  $R_{\text{P}}\text{-1}$  is at -1.54 ppm. (b) Hydrolysis of 2.0 mM compound **1** by 3  $\mu\text{M}$  PTE-G60A. Reaction is  $\sim 28\%$  complete. The single phosphorus containing product is at 2.02 ppm. (c) Reaction from **b** at  $\sim 40\%$  completion. (d) Hydrolysis of 2.0 mM compound **1** by 0.1  $\mu\text{M}$  PTE-In1W. Reaction is  $\sim 38\%$  complete. (e) Reaction from **d** at 50% completion.

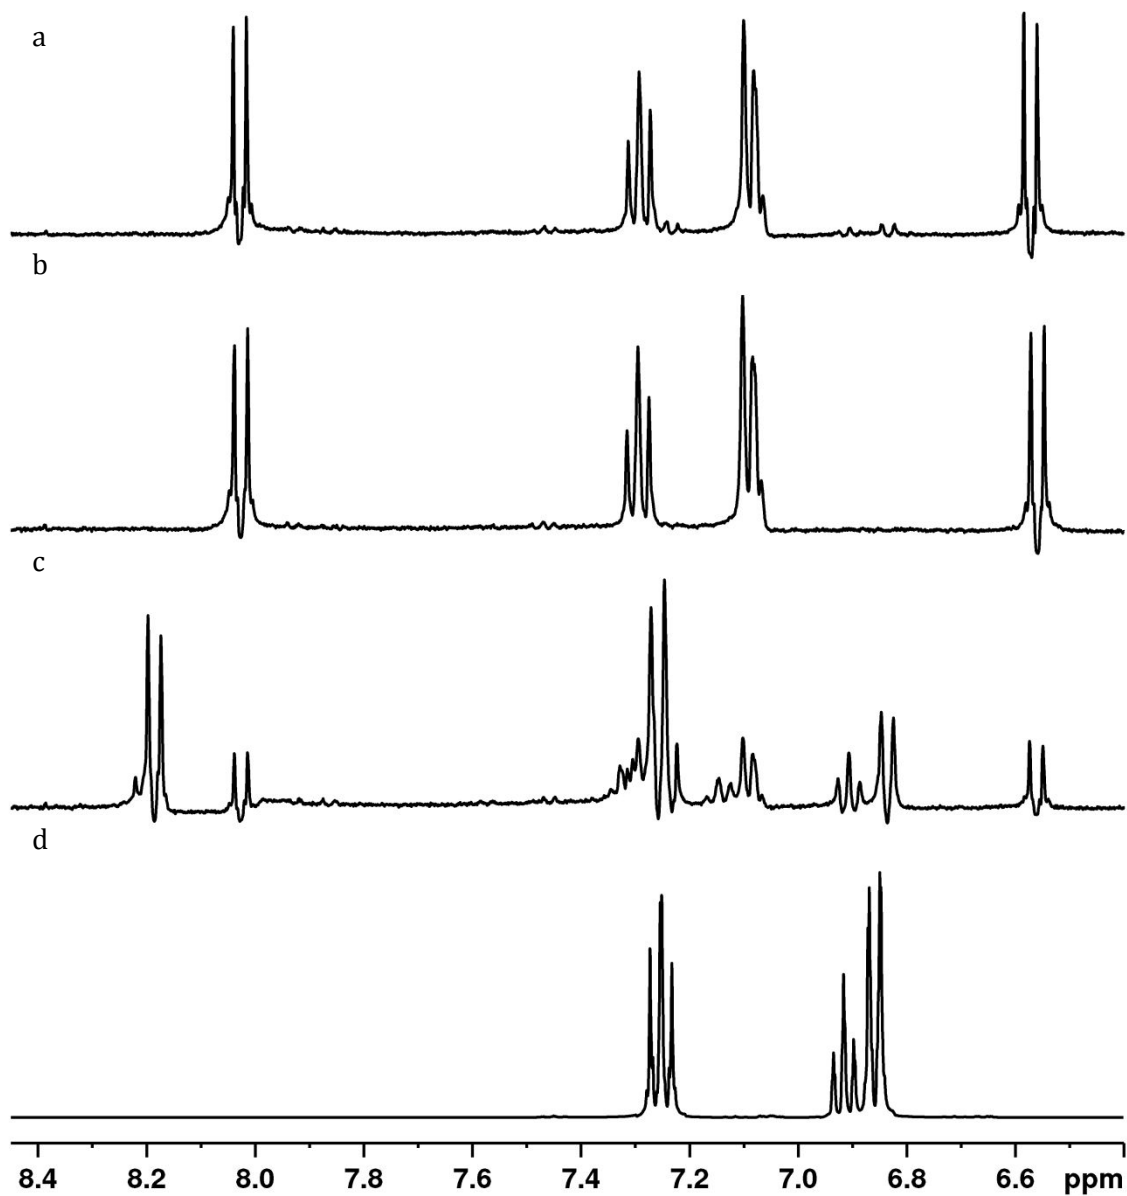

**Figure S4.**  $^1\text{H}$  NMR spectra of the hydrolysis products of compound **1**. (a) Hydrolysis products formed by hydrolysis of the isolated  $R_p$ -isomer by Sb-PTE. (b) Hydrolysis products formed by hydrolysis of the isolated  $R_p$ -isomer by WT-PTE. The doublets at 8.03 ppm and 6.56 ppm are due to free  $p$ -nitrophenol, while the triplet at 7.30 ppm and doublet at 7.09 ppm are due to phenol on the phosphodiester product. (c) Hydrolysis product of the isolated  $S_p$ -isomer by Sb-PTE. The doublets at 8.19 ppm and 7.26 ppm are due to  $p$ -nitrophenol on the diester product, while the triplet at 6.91 ppm and the doublet at 6.83 ppm are due to free phenol. (d) Spectra of pure phenol in buffered solution.

## REFERENCES

- [1] Bigley, A. N., Desormeaux, E., Xiang, D. F., Bae, S. Y., Harvey, S. P., and Raushel, F. M. (2019) Overcoming the Challenges of Enzyme Evolution To Adapt Phosphotriesterase for V-Agent Decontamination, *Biochemistry* 58, 2039-2053.
- [2] Bigley, A. N., Xu, C., Henderson, T. J., Harvey, S. P., and Raushel, F. M. (2013) Enzymatic neutralization of the chemical warfare agent VX: evolution of phosphotriesterase for phosphorothiolate hydrolysis, *J. Am. Chem. Soc.* 135, 10426-10432.
- [3] Chen-Goodspeed, M., Sogorb, M. A., Wu, F., Hong, S. B., and Raushel, F. M. (2001) Structural determinants of the substrate and stereochemical specificity of phosphotriesterase, *Biochemistry* 40, 1325-1331.
- [4] Chen-Goodspeed, M., Sogorb, M. A., Wu, F., and Raushel, F. M. (2001) Enhancement, relaxation, and reversal of the stereoselectivity for phosphotriesterase by rational evolution of active site residues, *Biochemistry* 40, 1332-1339.
- [5] Tsai, P. C., Bigley, A., Li, Y., Ghanem, E., Cadieux, C. L., Kasten, S. A., Reeves, T. E., Cerasoli, D. M., and Raushel, F. M. (2010) Stereoselective hydrolysis of organophosphate nerve agents by the bacterial phosphotriesterase, *Biochemistry* 49, 7978-7987.
